# Supplementary material for: High performance hierarchical nanoporous antireflective films by a facile sol–gel process
Source: Royal Society of Chemistry journal article supplement (doi:10.1039/c6ra20524k), 2016-01-01
Supplement: c6ra20524k1.pdf [file c6ra20524k1.pdf]

**High-performance Anti-reflective Sol-gel Films Hierarchically by F127-templated Nano-pores and Ph-TES Modified Hollow Silica Nano-spheres**

Yao Xiao, Ronghua Ma, Xinkai Chen, Xvsheng Qiao,\* Xianping Fan

*State Key Laboratory of Silicon Materials & School of Materials Science and Engineering, Zhejiang University, Hangzhou 310027, China*

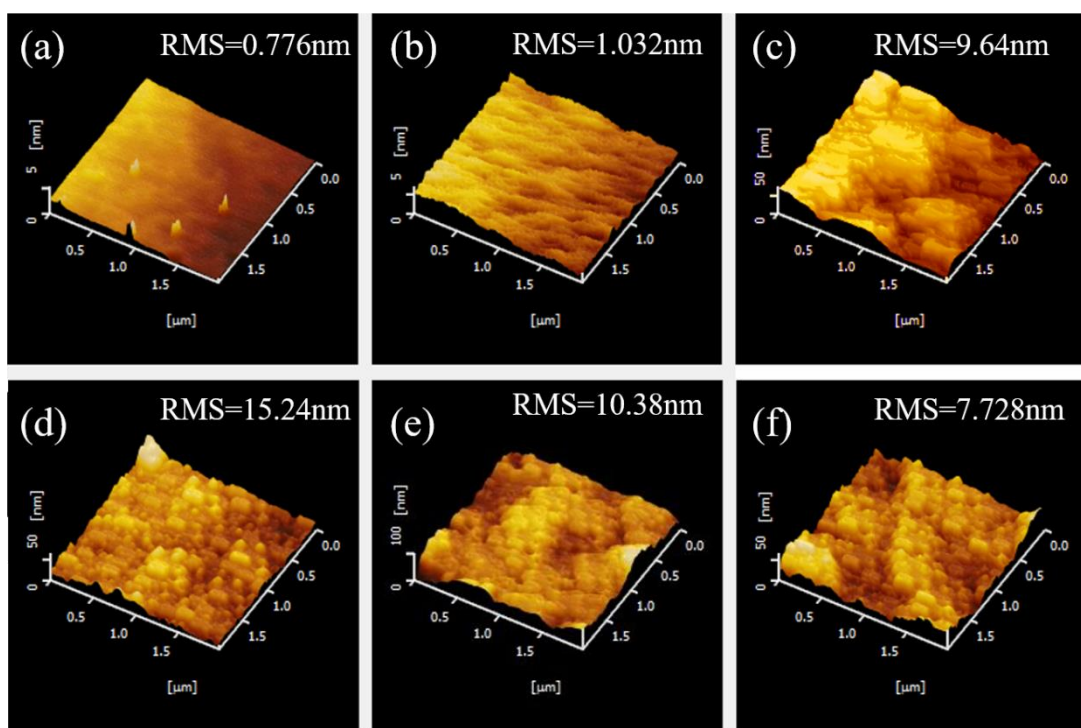

**Figure S1** The AFM images of SLAR coating of AR-SiO<sub>2</sub>(a), AR-F127(b), AR-HSN(c), AR-10(d), AR-30(e) and AR-50(f) double side coated super white glass.

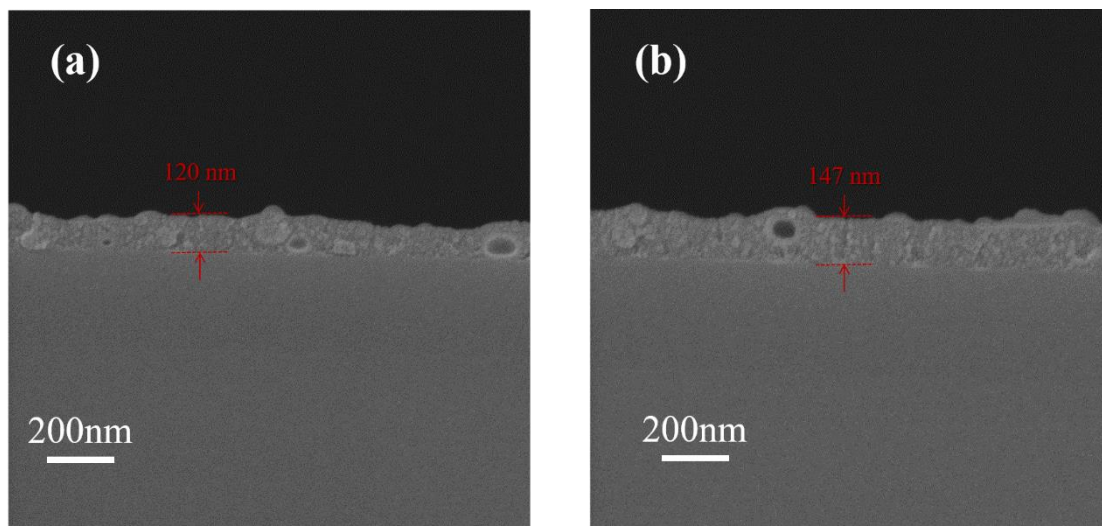

**Figure S2** cross-section SEM images of AR-10 nano-porous films(a) and AR-30 nano-porous films(b).

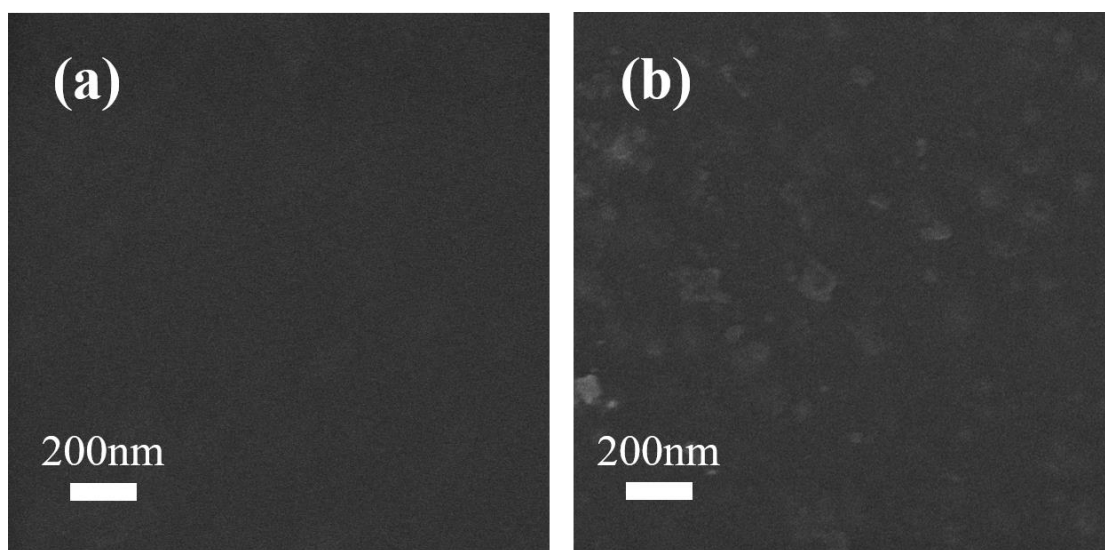

**Figure S3** The surface SEM of AR-SiO<sub>2</sub> (a) and AR-HSN (b)

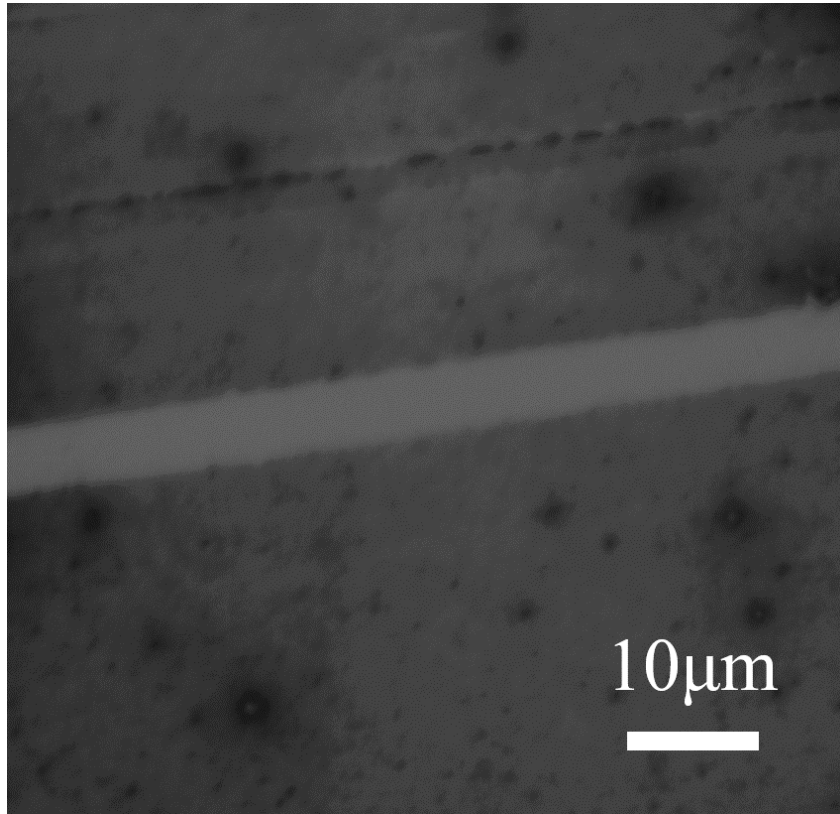

**Figure S4** The optical micrograph of AR-50 coating after pencil hardness test
